# Supplementary material
Source: PubMed Central journal article supplement (PMC6990866)

## Supplementary Online Content

Burgio KL, Kraus SR, Johnson TM II, et al. Effectiveness of combined behavioral and drug therapy for overactive bladder symptoms in men: a randomized clinical trial. *JAMA Intern Med*. Published online January 13, 2020. doi:10.1001/jamainternmed.2019.6398

**eTable 1.** Exclusion criteria

**eTable 2.** Changes in voiding frequency and other urinary symptoms of participants who completed the study: baseline to 6 weeks of therapy

**eTable 3.** Changes in voiding frequency and other urinary symptoms of participants who completed the study: baseline to 12 weeks of therapy

**eFigure.** Overview of study design

This supplementary material has been provided by the authors to give readers additional information about their work.

**eTable 1.** Exclusion criteria

|                                                                                                                                                                                                                                                                                                              |
|--------------------------------------------------------------------------------------------------------------------------------------------------------------------------------------------------------------------------------------------------------------------------------------------------------------|
| <ul style="list-style-type: none"><li>• Urinary flow rate &lt; 8.0 mL/sec on a void greater than 125 mL</li></ul>                                                                                                                                                                                            |
| <ul style="list-style-type: none"><li>• Post-void residual volume &gt; 150 mL (based on bladder ultrasound after voiding in the presence of a usual urge to urinate)</li></ul>                                                                                                                               |
| <ul style="list-style-type: none"><li>• Urinary tract infection (defined as growth of &gt;100,000 colonies per mL of a urinary pathogen on urine culture). Participants were referred for treatment with antibiotics and could be enrolled if OAB symptoms persisted after the infection resolved.</li></ul> |
| <ul style="list-style-type: none"><li>• Transurethral resection of the prostate (TURP), simple prostatectomy, or other BPH related surgery within the past 5 years</li></ul>                                                                                                                                 |
| <ul style="list-style-type: none"><li>• Current active treatment for prostate cancer</li></ul>                                                                                                                                                                                                               |
| <ul style="list-style-type: none"><li>• History of radical prostatectomy.</li></ul>                                                                                                                                                                                                                          |
| <ul style="list-style-type: none"><li>• Previous artificial urinary sphincter, sling procedure, bladder injection of botulinum toxin bladder injections, or implanted sacral neuromodulation device</li></ul>                                                                                                |
| <ul style="list-style-type: none"><li>• Poorly controlled diabetes (glycosylated hemoglobin <math>\geq</math>9.0 within last 3 months). Subjects with poorly controlled diabetes were offered enrollment if the OAB symptoms persisted after the diabetes was controlled.</li></ul>                          |
| <ul style="list-style-type: none"><li>• Hematuria on microscopic examination in the absence of infection. A urologic consultation was recommended, and enrollment depended on clearance by a urologist and agreement by the Site PI.</li></ul>                                                               |
| <ul style="list-style-type: none"><li>• Any unstable medical condition (particularly: cancers under active treatment, decompensated congestive heart failure, history of malignant arrhythmias, unstable angina, diagnosed by history or physical exam)</li></ul>                                            |
| <ul style="list-style-type: none"><li>• Neurologic conditions such as Parkinson disease, spinal cord injury, multiple sclerosis, or myasthenia gravis</li></ul>                                                                                                                                              |

|                                                                                                                                                                                                                                                                        |
|------------------------------------------------------------------------------------------------------------------------------------------------------------------------------------------------------------------------------------------------------------------------|
| <ul style="list-style-type: none"> <li>• Positive screening test for dementia on the Mini-Cog (score <math>\leq</math> 2)</li> </ul>                                                                                                                                   |
| <ul style="list-style-type: none"> <li>• Unable to toilet independently</li> </ul>                                                                                                                                                                                     |
| <ul style="list-style-type: none"> <li>• Contraindications to the study drugs, including history of postural hypotension with syncope, history of acute urinary retention requiring catheterization, narrow angle glaucoma, or history of gastric retention</li> </ul> |
| <ul style="list-style-type: none"> <li>• Hypersensitivity to tolterodine or tamsulosin</li> </ul>                                                                                                                                                                      |
| <ul style="list-style-type: none"> <li>• Current use of alpha-blocker. Evaluation was delayed until the drug had been discontinued for 2 weeks.</li> </ul>                                                                                                             |
| <ul style="list-style-type: none"> <li>• Current use of an anti-muscarinic or beta-3 agonist for OAB. Evaluation was delayed until the drug was discontinued for 2 weeks.</li> </ul>                                                                                   |
| <ul style="list-style-type: none"> <li>• If on a diuretic, dose had not been stable for at least 4 weeks</li> </ul>                                                                                                                                                    |
| <ul style="list-style-type: none"> <li>• If taking dutasteride or finasteride, dose had not been stable for at least 6 months</li> </ul>                                                                                                                               |
| <ul style="list-style-type: none"> <li>• If on an antibiotic for prostatitis. Participants were offered re-evaluation if OAB symptoms persisted after antibiotics were completed.</li> </ul>                                                                           |
| <ul style="list-style-type: none"> <li>• Full course of behavioral therapy</li> </ul>                                                                                                                                                                                  |

**eTable 2.** Changes in voiding frequency and other urinary symptoms of participants who completed the study: baseline to 6 weeks of therapy

|                                                      | <b>Behavioral</b> | <b>Drug</b>    | <b>Combined</b> | <b>P-Value</b> |
|------------------------------------------------------|-------------------|----------------|-----------------|----------------|
| <b>Bladder Diary Variables</b>                       | Mean (SD) N=63    | Mean (SD) N=61 | Mean (SD) N=59  |                |
| <b>24-Hour Voiding Frequency</b>                     |                   |                |                 |                |
| Baseline                                             | 11.8 (2.4)        | 11.7 (2.5)     | 11.6 (2.3)      | 0.8030         |
| Post-treatment                                       | 8.8 (2.2)         | 10.2 (2.7)     | 8.2 (2.3)       | <.0001*        |
| Change (baseline to 6 weeks)                         | 3.0 (2.4)         | 1.5 (2.4)      | 3.3 (1.8)       | <.0001*        |
| Percent change                                       | 25.4%             | 12.8%          | 28.4%           |                |
| P-Value (within group)**                             | <.0001            | <.0001         | <.0001          |                |
| <b>Nocturia</b>                                      |                   |                |                 |                |
| Baseline                                             | 2.1 (1.2)         | 2.2 (1.1)      | 2.1 (1.3)       | 0.7171         |
| Post-treatment                                       | 1.4 (0.8)         | 1.8 (1.2)      | 1.3 (1.0)       | 0.0034 *       |
| Change (baseline to 6 weeks)                         | 0.8 (1.0)         | 0.4 (1.0)      | 0.8 (1.1)       | 0.0034*        |
| P-Value (within group)**                             | <.0001            | 0.0005         | <.0001          |                |
| <b>Urgency Score†</b>                                |                   |                |                 |                |
| Baseline                                             | 1.6 (0.6)         | 1.6 (0.5)      | 1.5 (0.6)       | 0.3781         |
| Post-treatment                                       | 1.6 (0.6)         | 1.5 (0.5)      | 1.3 (0.7)       | 0.0048*        |
| Change (baseline to 6 weeks)                         | -0.1 (0.5)        | 0.1 (0.5)      | 0.2 (0.6)       | 0.0048*        |
| P-Value (within group)**                             | 0.1637            | 0.1280         | 0.0218          |                |
| <b>Maximum Urgency Score†</b>                        |                   |                |                 |                |
| Baseline                                             | 2.3 (0.7)         | 2.4 (0.6)      | 2.4 (0.6)       | 0.8958         |
| Post-treatment                                       | 2.2 (0.7)         | 2.2 (0.6)      | 1.8 (0.8)       | 0.0001*        |
| Change (baseline to 6 weeks)                         | 0.1 (0.6)         | 0.2 (0.6)      | 0.5 (0.7)       | 0.0001*        |
| P-Value (within group)**                             | 0.0613            | 0.0002         | <.0001          |                |
| <b>Incontinence (episodes/week)</b>                  |                   |                |                 |                |
| Baseline                                             | 6.1 (10.0)        | 5.9 (10.9)     | 6.4 (9.4)       | 0.8578         |
| Post-treatment                                       | 2.4 (5.1)         | 2.6 (7.0)      | 1.0 (3.7)       | 0.1423*        |
| Change (baseline to 6 weeks)                         | 3.7 (7.3)         | 3.3 (11.1)     | 5.4 (8.7)       | 0.1423*        |
| Percent reduction                                    | 60.7%             | 55.9%          | 84.4%           |                |
| P-Value (within group)**                             | <.0001            | 0.0031         | <.0001          |                |
| <b>Overactive Bladder Questionnaire (OAB-q).</b>     |                   |                |                 |                |
| Baseline                                             | 64.4 (33.4)       | 60.4 (32.8)    | 63.0 (33.5)     | 0.7700         |
| Post-treatment                                       | 41.6 (28.1)       | 38.4 (30.4)    | 23.5 (22.7)     | <.0001*        |
| Change (baseline to 6 weeks)                         | 22.8 (20.1)       | 22.0 (28.3)    | 39.5 (30.7)     | <.0001*        |
| P-Value (within group)**                             | <.0001            | <.0001         | <.0001          |                |
| <b>International Prostate Symptom Score (IPSS) §</b> |                   |                |                 |                |
| Baseline                                             | 15.7 (5.6)        | 16.2 (5.7)     | 17.3 (6.2)      | 0.2193         |
| Post-treatment                                       | 11.2 (5.3)        | 11.2 (5.8)     | 8.9 (4.7)       | <.0001*        |
| Change (baseline to 6 weeks)                         | 4.4 (3.9)         | 5.0 (5.9)      | 8.4 (4.9)       | <.0001*        |
| P-Value (within group)**                             | <.0001            | <.0001         | <.0001          |                |

\* P-value is for an F test adjusting for baseline values and age.

\*\* P-value (w/ group) compared baseline vs. post-treatment (treatment effects) with Wilcoxon signed rank sum test.

† Scores range from 0 to 3:

0 - None - no urgency

1- Mild - awareness of urgency, but is *easily tolerated*

2 - Moderate - enough urgency discomfort that it *interferes with or shortens* usual activity

3 - Severe - extreme urgency discomfort that abruptly *stops all* activities or tasks

§ Scores range from 0 to 35 with higher scores indicating more frequent lower urinary tract symptoms.

**eTable 3.** Changes in voiding frequency and other urinary symptoms of participants who completed the study: baseline to 12 weeks of therapy

|                                                      | <b>Behavioral</b> | <b>Drug</b>    | <b>Combined</b> | <b>P-Value</b> |
|------------------------------------------------------|-------------------|----------------|-----------------|----------------|
| <b>Bladder Diary Variables</b>                       | Mean (SD) N=63    | Mean (SD) N=61 | Mean (SD) N=59  |                |
| <b>24-Hour Voiding Frequency</b>                     |                   |                |                 |                |
| Baseline                                             | 11.8 (2.4)        | 11.7 (2.5)     | 11.6 (2.3)      | 0.8030         |
| 12-weeks treatment                                   | 8.1 (2.2)         | 8.6 (2.4)      | 8.0 (2.2)       | 0.2902*        |
| Change (Baseline to 12 weeks)                        | 3.8 (2.3)         | 3.2 (2.5)      | 3.6 (2.0)       | 0.2902*        |
| Percent change                                       | 32.2%             | 27.4%          | 31.0%           |                |
| P-Value (within group)**                             | <.0001            | <.0001         | <.0001          |                |
| <b>Nocturia</b>                                      |                   |                |                 |                |
| Baseline treatment                                   | 2.1 (1.2)         | 2.2 (1.1)      | 2.1 (1.3)       | 0.7171         |
| 12-weeks treatment                                   | 1.2 (0.9)         | 1.4 (1.1)      | 1.2 (1.0)       | 0.3594 *       |
| Change (Baseline to 12 weeks)                        | 0.9 (1.0)         | 0.7 (1.0)      | 1.0 (0.9)       | 0.3594*        |
| P-Value (within group)**                             | <.0001            | <.0001         | <.0001          |                |
| <b>Urgency Score†</b>                                |                   |                |                 |                |
| Baseline treatment                                   | 1.6 (0.6)         | 1.6 (0.5)      | 1.5 (0.6)       | 0.3781         |
| 12-weeks treatment                                   | 1.5 (0.6)         | 1.5 (0.6)      | 1.2 (0.6)       | 0.0534*        |
| Change (Baseline to 12 weeks)                        | 0.1 (0.6)         | 0.2 (0.6)      | 0.2 (0.6)       | 0.0534*        |
| P-Value (within group)**                             | 0.4471            | 0.1191         | 0.0058          |                |
| <b>Maximum Urgency Score†</b>                        |                   |                |                 |                |
| Baseline treatment                                   | 2.3 (0.7)         | 2.4 (0.6)      | 2.4 (0.6)       | 0.8958         |
| 12-weeks treatment                                   | 2.0 (0.8)         | 2.0 (0.8)      | 1.8 (0.8)       | 0.0602*        |
| Change (Baseline to 12 weeks)                        | 0.3 (0.7)         | 0.4 (0.7)      | 0.6 (0.8)       | 0.0602*        |
| P-Value (within group)**                             | 0.0001            | <.0001         | <.0001          |                |
| <b>Incontinence (episodes/week)</b>                  |                   |                |                 |                |
| Baseline treatment                                   | 6.1 (10.0)        | 5.9 (10.9)     | 6.4 (9.4)       | 0.8578         |
| 12-weeks treatment                                   | 1.0 (2.5)         | 1.0 (3.1)      | 1.1 (3.2)       | 0.9805*        |
| Change Baseline to 12 weeks)                         | 5.1 (8.8)         | 5.0 (10.5)     | 5.3 (8.4)       | 0.9805*        |
| Percent reduction                                    | 83.6%             | 84.7%          | 82.8%           |                |
| P-Value (within group)**                             | <.0001            | <.0001         | <.0001          |                |
| <b>Overactive Bladder Questionnaire (OAB-q).</b>     |                   |                |                 |                |
| Baseline treatment                                   | 64.4 (33.4)       | 60.4 (32.8)    | 63.0 (33.5)     | 0.7700         |
| 12-weeks treatment                                   | 22.0 (22.1)       | 26.4 (25.3)    | 18.3 (18.7)     | 0.0829*        |
| Change (Baseline to 12 weeks)                        | 42.4 (30.0)       | 34.0 (29.8)    | 44.7(33.0)      | 0.0829*        |
| P-Value (within group)**                             | <.0001            | <.0001         | <.0001          |                |
| <b>International Prostate Symptom Score (IPSS) §</b> |                   |                |                 |                |
| Baseline treatment                                   | 15.7 (5.6)        | 16.2 (5.7)     | 17.3 (6.2)      | 0.2193         |
| 12-weeks treatment                                   | 8.2 (5.4)         | 8.8 (4.7)      | 7.9 (4.8)       | 0.3353*        |
| Change (Baseline to 12 weeks)                        | 7.5 (5.3)         | 7.5 (6.0)      | 9.3 (5.4)       | 0.3353*        |
| P-Value (within group)**                             | <.0001            | <.0001         | <.0001          |                |

\* P-value is for an F test adjusting for baseline values and age.

\*\* P-value (w/in group) compared baseline vs. 12-weeks (treatment effects) with Wilcoxon signed rank sum test.

† Scores range from 0 to 3:

0 - None - no urgency

1 - Mild - awareness of urgency, but is *easily tolerated*

2 - Moderate - enough urgency discomfort that it *interferes with or shortens* usual activity

3 - Severe - extreme urgency discomfort that abruptly *stops all* activities or tasks

§ Scores range from 0 to 35 with higher scores indicating more frequent lower urinary tract symptoms.

**eFigure.** Overview of study design

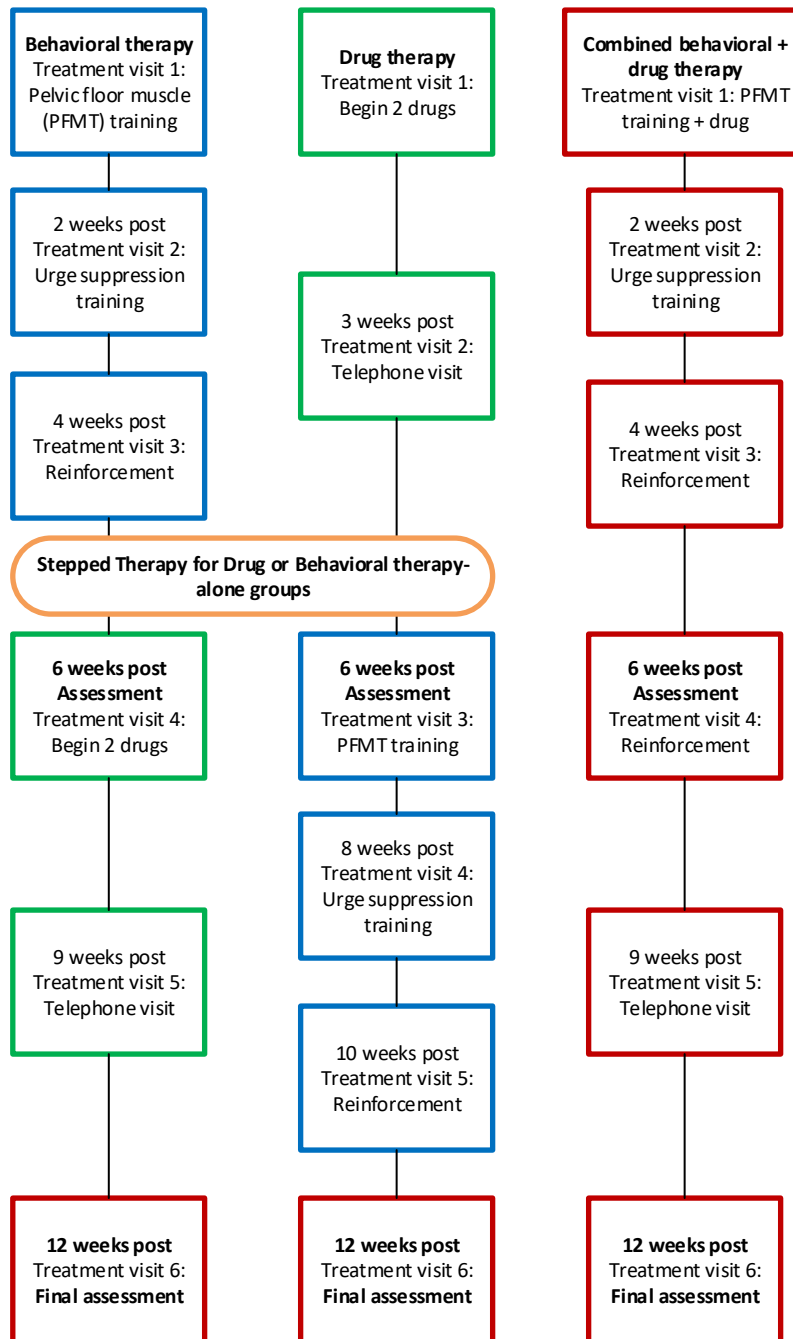

Supplement: jamainternmed-180-411-s002.pdf [file jamainternmed-180-411-s002.pdf]
