# Supplementary material
Source: PubMed Central journal article supplement (PMC6990866)
Supplement: jamainternmed-180-411-s003.pdf [file jamainternmed-180-411-s003.pdf]

## Data Sharing Statement

Burgio. Effectiveness of Combined Behavioral and Drug Therapy for Overactive Bladder Symptoms in Men. *JAMA Intern Med*. Published January 13, 2020. 10.1001/jamainternmed.2019.6398

### Data

**Data available:** Yes

**Data types:** Deidentified participant data

**How to access data:** Investigators may contact the lead author to propose an analysis and coordinate the process of submitting a proposal and preparing the data use agreement ([kburgio@uabmc.edu](mailto:kburgio@uabmc.edu)).

**When available:** beginning date: 07-01-2020

### Supporting Documents

**Document types:** None

### Additional Information

**Who can access the data:** Data will be available to investigators who provide an IRB/Ethics approval or certification of exemption from IRB/Ethics review, and agree to the terms and conditions of a data use agreement.

**Types of analyses:** Any purpose for which investigators provide an IRB/Ethics approval or certification of exemption from IRB/Ethics review.

**Mechanisms of data availability:** Some support may be needed, depending on the extent of the request. IRB/Ethics approval or certification of exemption from IRB/Ethics review will be required. Signed data use agreement will be required.
